# Supplementary material for: Collective Behavior in Active Swarms: Dynamics at the Edge of Disorder
Source: Research Square preprint supplement (doi:10.21203/rs.3.rs-7075333/v1), 2025-07-28
Supplement: Supplementary file 1 [file a979b16ffb47596b9685d05c.pdf]

# SUPPLEMENTARY INFORMATION: Collective Behavior in Active Swarms: Dynamics at the Edge of Disorder

Priyanka Iyer, Dmitry A. Fedosov, and Gerhard Gompper

*Theoretical Physics of Living Matter, Institute of Biological Information Processing and Institute for Advanced Simulation,  
Forschungszentrum Jülich, 52425 Jülich, Germany*

(Dated: July 8, 2025)

## I. POLARIZATION ORDER PARAMETER

The ordering in the system is measured by the polarization order parameter

$$P = \frac{1}{N} \left| \sum_j \exp(i\theta_j(t)) \right|_t \quad (1)$$

where  $\theta_j(t)$  is the polar angle of the orientation vector  $\mathbf{e}_j(t)$  of particle  $j$  and the sum is over all particles in the system. One can also define a non-equilibrium susceptibility, which is a measure of the fluctuations in the system as

$$\chi_p = N(\langle P^2 \rangle - \langle P \rangle^2) \quad (2)$$

## II. DYNAMIC STRUCTURE FACTOR

To measure the density fluctuations in the flock, we calculate the dynamic structure factor, starting from the microscopic density field  $\rho(\mathbf{r}, t)$ . The microscopic density field  $\rho(\mathbf{r}, t)$  is defined as

$$\rho(\mathbf{r}, t) = \sum_{j=1}^N \delta(\mathbf{r} - \mathbf{r}_j(t)), \quad (3)$$

where  $\mathbf{r}_j(t)$  is the position of particle  $j$  at time  $t$ , and  $N$  is the total number of particles. The spatial Fourier transform of the density field is then given by

$$\rho(\mathbf{q}, t) = \int d\mathbf{r} e^{-i\mathbf{q} \cdot \mathbf{r}} \rho(\mathbf{r}, t) = \sum_{j=1}^N e^{-i\mathbf{q} \cdot \mathbf{r}_j(t)}. \quad (4)$$

The intermediate scattering function  $F(\mathbf{q}, t)$  is defined as the autocorrelation of the Fourier-transformed density:

$$F(\mathbf{q}, t) = \frac{1}{N} \langle \rho(\mathbf{q}, t_0 + t) \rho(-\mathbf{q}, t_0) \rangle_{t_0}, \quad (5)$$

and the dynamic structure factor  $S(\mathbf{q}, \omega)$  is then obtained via the temporal Fourier transform

$$S(\mathbf{q}, \omega) = \int_{-\infty}^{\infty} dt e^{i\omega t} F(\mathbf{q}, t). \quad (6)$$

In isotropic systems, we can use radially averaged dynamic structure factor and intermediate scattering function by averaging over all wavevectors  $\mathbf{q}$  of the same magnitude  $q = |\mathbf{q}|$ .

The radially averaged intermediate scattering function is defined as

$$F(q, t) = \frac{1}{N_q} \sum_{|\mathbf{q}|=q} F(\mathbf{q}, t), \quad (7)$$

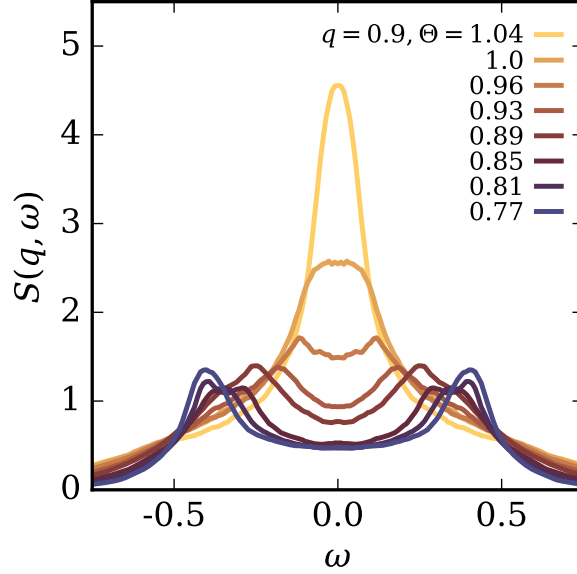

FIG. 1: The dynamic structure factor at a fixed  $q = 0.9$  for different  $\Theta$ . For large  $\Theta$ , the structure is Lorentzian and therefore the density fluctuations are diffusive. As  $\Theta$  is increased, a peak at small  $v_\rho = \omega/q$  develops. When  $\Theta$  is further increased, a 'two-peak' structure emerges, which signals the existence of two propagating excitations with different velocities. Here  $N = 6000$ ,  $K = 80$ , and  $\text{eta} = 1$ .

where  $N_q$  is the number of wavevectors with magnitude  $q$ . As before, the radially averaged dynamic structure factor is then computed as

$$S(q, \omega) = \int_{-\infty}^{\infty} dt e^{i\omega t} F(q, t). \quad (8)$$

### III. BOUNDARY LENGTH ESTIMATION

To estimate the boundary length, we first determine the number of edge particles,  $N_b$ , by counting those with fewer than  $n_c$  neighbours, where  $n_c$  is a cutoff parameter. Different choices of  $n_c$  yield varying estimates of  $N_b$ , as shown in the Fig. 2. Notably, when  $\Omega_f$  is small, the average inter-particle spacing decreases, making a smaller  $n_c$  more suitable for estimating the boundary length. Conversely, for larger  $\Omega_f$ , a higher  $n_c$  may be more appropriate. Since our focus is on the trend with  $\Omega_f$  rather than an exact estimate of  $N_b$ , we average over different cutoff choices,  $n_c \in [12, 15]$ . The boundary length is then given as  $l_b \simeq R_a \langle N_b \rangle$ . The boundary length of a circular, disk-like arrangement of  $N$  particles can be estimated by assuming they occupy a disk perimeter  $l_0$  and radius  $R_0$ . Given the inter-agent separation  $R_a$ , the radius is approximated as

$$R_0 = R_a \sqrt{N} \quad (9)$$

From this, the flock boundary length is obtained as

$$l_0 = 2\pi R_0 = 2\pi R_a \sqrt{N} \quad (10)$$

To determine the relation between  $\Omega_f$  and line tension, we consider the Monge parameterization of the flock boundary at a point  $x$  as a function  $h(\mathbf{x})$ , representing the height of the flock boundary above a reference line. Any fluctuations of this boundary incur an energy cost given by

$$E = \int dx \sigma_{\text{eff}} (\nabla h(x))^2 \quad (11)$$

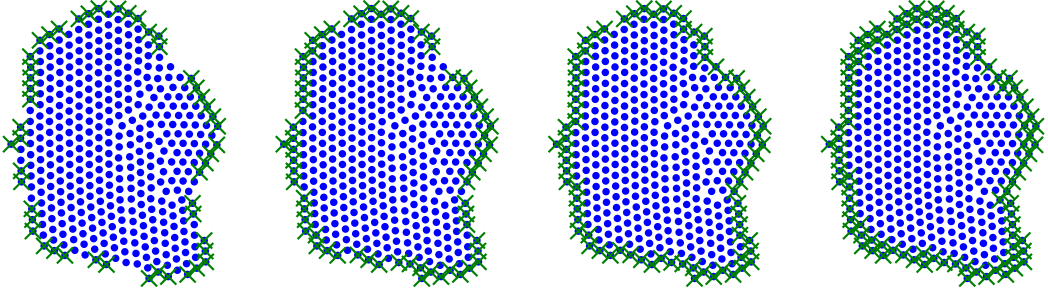

FIG. 2: Flock snapshots showing the boundary particles (marked in green crosses) for different threshold choices,  $n_c =$  (a) 12 (b) 13 (c) 14 and (d) 15. For  $n_c = 12$ , the boundary length is under estimated while for  $n_c = 15$ , there is an overestimation. The final length is determined by averaging over these choices.

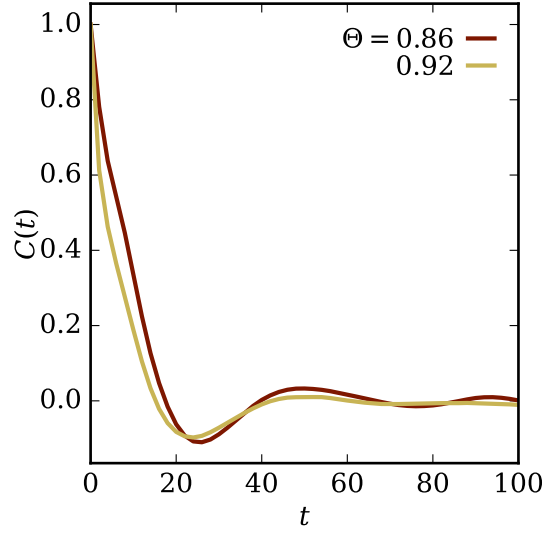

FIG. 3: Velocity auto-correlation  $C(t)$  of the flocking showing negative correlations. Here  $N = 400$ ,  $\eta = 0.5$ , and  $K = 40$ .

where  $\sigma_{\text{eff}}$  is an effective tension. Employing the Fourier transform  $h(q) = (2\pi)^{-1} \int dx h(x) \exp(iqx)$ , the mode spectrum for the height fluctuations is obtained as

$$\langle h(q)h(q') \rangle = \frac{\pi T_{\text{eff}}}{\sigma_{\text{eff}} q^2} \delta(q - q') \quad (12)$$

where  $T_{\text{eff}}$  is some measure of temperature in the system (due to noise, collision avoidance etc). In the small-gradient approximation, the line element of the flock boundary is  $dl = d\mathbf{r} \sqrt{1 + (\nabla h)^2} \simeq (1 + (\nabla h)^2/2) d\mathbf{r}$ .

With the assumption that the flock boundary deviates locally from a circle, the average flock boundary is then obtained as

$$\langle l_b \rangle = l_0 + \frac{T_{\text{eff}} \pi}{2\sigma_{\text{eff}} R_a}. \quad (13)$$

where  $l_0 = 2\pi R_a \sqrt{N}$  is the length of the flock boundary for a perfectly circular flock made of  $N$  particles maintaining an average separation  $R_a$ .

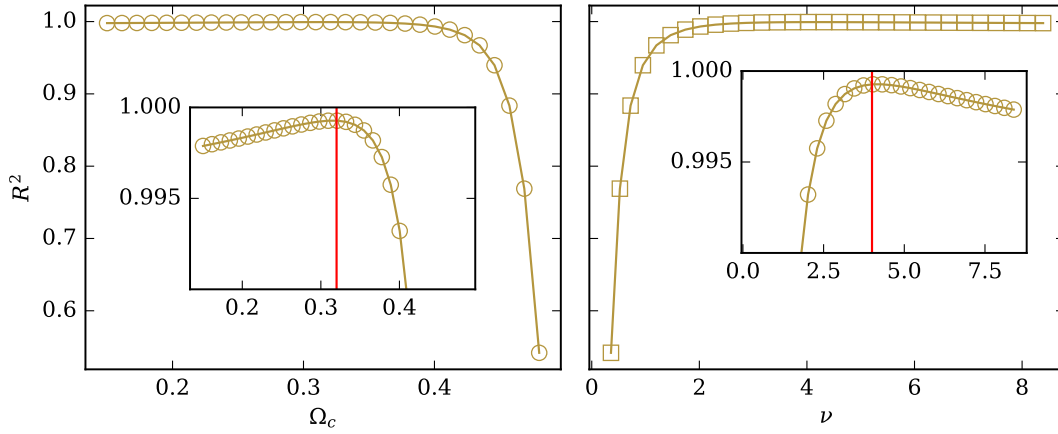

FIG. 4: The goodness of fit, measured via the coefficient of determination  $R^2$  for different  $\nu$  and  $\Omega_c/K$  pairs. Here for a given  $\Omega_c/K$ , we fit the equation  $\Omega_c(L)/K = \Omega_c/K + AL^{-\nu}$ . It can be seen that for  $\nu > 3$  and  $\Omega_c/K < 0.35$ , the fit is degenerate  $R^2 \simeq 0.99$

#### IV. FIT DEGENERACY

For the change of the finite-size critical point  $\Omega_a(L)$ , we fit the generalized from

$$\Omega_c(L) = \Omega_c^\infty + AL^{-1/\nu} \quad (14)$$

where  $A$  is a constant obtained from the fitting procedure. For different choices of  $\Omega_c^\infty$ , we find that any value of  $\nu \gtrsim 3.0$  and  $\Omega_c^\infty \lesssim 0.35$  provides a good fit to the data, given the associated error, i.e., a coefficient of determination  $R^2 > 0.99$  (see Fig. 4). Notably, the scaling of the mean polarization  $\langle P \rangle$  and susceptibility  $\chi_p$  for the fitted parameter sets is also degenerate, suggesting that the standard finite-size scaling analysis of second-order transitions may not apply. This indicates the possibility that the transition is not of second order.

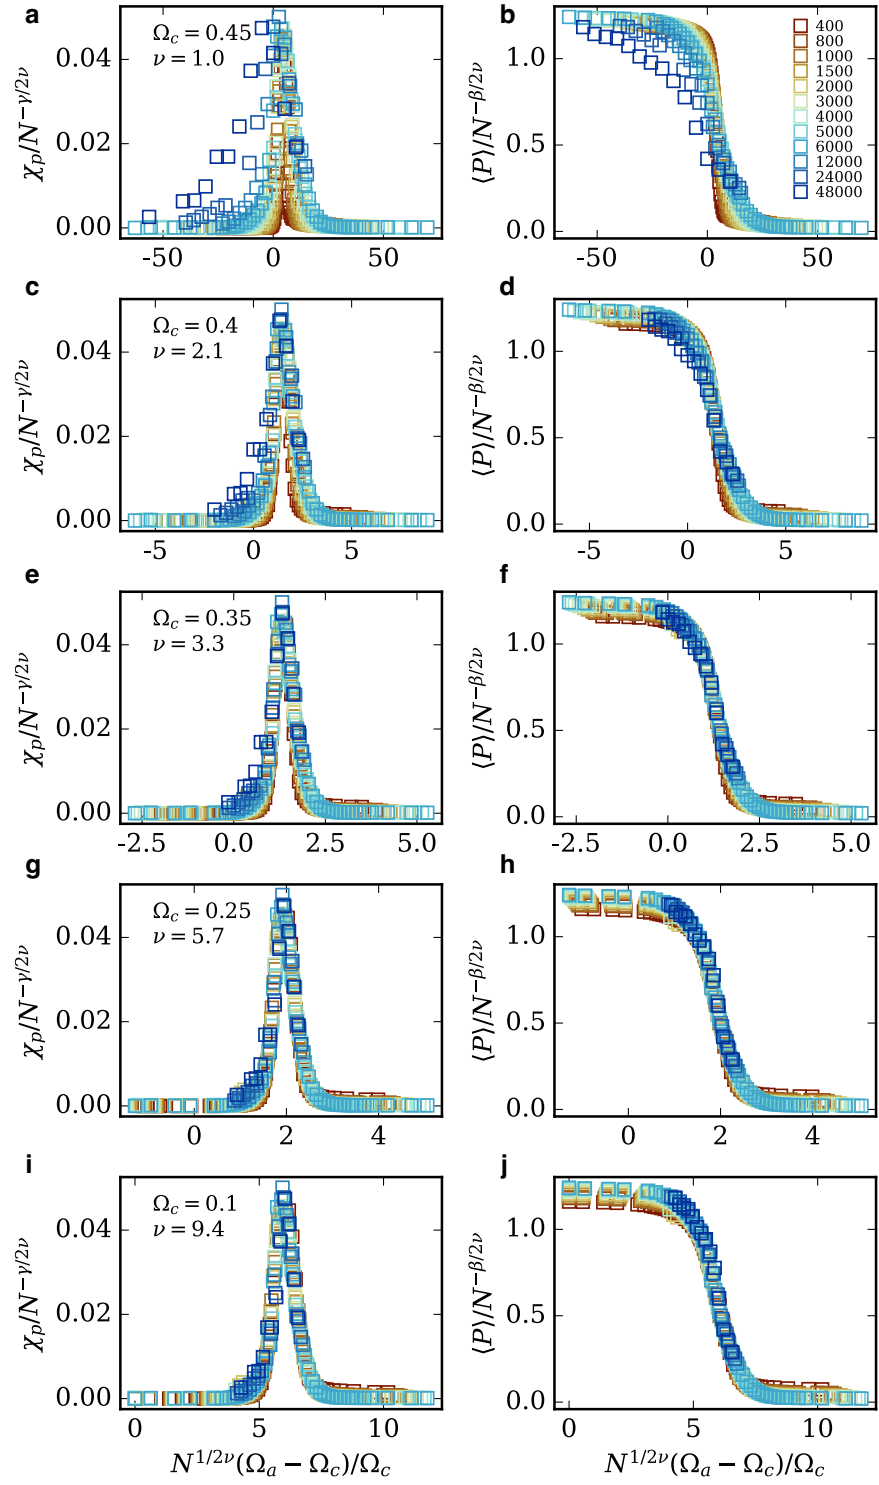

FIG. 5: (a,c,e,g,i) Scaled polarization and (b,d,f,h,j) susceptibility curves for different  $\Omega_c$  and  $\nu$  values. As in Fig. 4, the scaling is degenerate for  $\nu > 3$  and  $\Omega_c/K < 0.35$

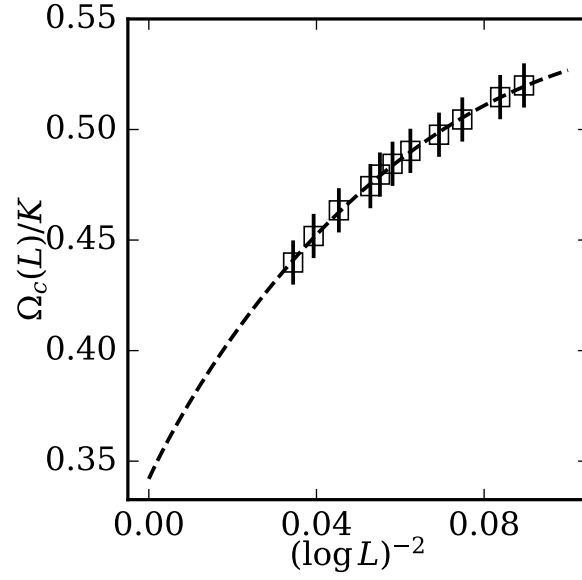

FIG. 6: Finite-size scaling of  $\Omega_c$  with the assumption of a logarithmic growth for the correlation function. Here, the fit function has the form  $\Omega_c(L)/K = \Omega_c/K + A/(\log L)^2 + B/(\log L)^3$ . The best fit parameters are  $\Omega_c/K = 0.34$ ,  $A = 4.3$ , and  $B = 7.8$ .

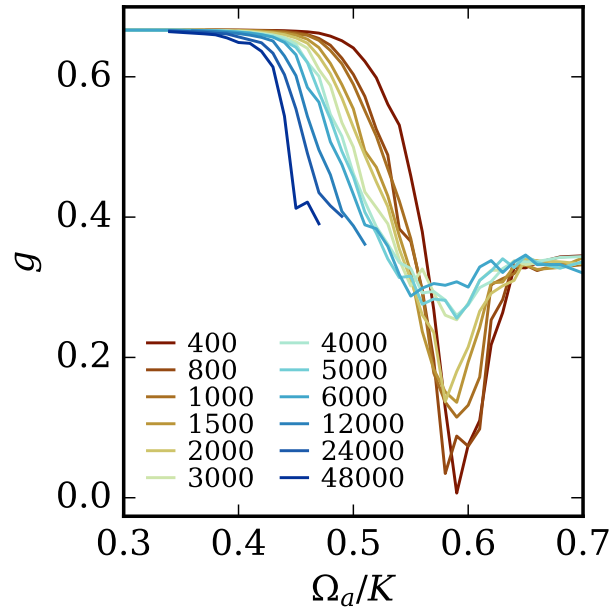

FIG. 7: Binder cumulant  $g = 1 - \langle P^4 \rangle / 3 \langle P^2 \rangle^2$  for different system sizes. No clear crossing develops, therefore  $\Omega_c$  cannot be determined via this analysis.

## V. MOVIE CAPTIONS

*Movie M1*– Flock motion for  $N = 400$  and  $\Theta = 0.12$  ( $K = 40$ ,  $\eta = 0.5$ ). The flock has a large persistence length and shows ballistic motion. Circles show the position of the center of mass with time.

*Movie M2*– Flock motion for  $N = 400$  and  $\Theta = 0.74$  ( $K = 40$ ,  $\eta = 0.5$ ). The flock has a small persistence length and shows diffusive motion. Circles show the position of the center of mass with time.

*Movie M3*– Time evolution of the density map  $\rho(\mathbf{r}, t)$  for  $N = 6000$  and  $\Theta = 0.94$  ( $K = 80$ ,  $\eta = 1$ ) exhibiting large shape and density fluctuations of the flock.

*Movie M4*– Time evolution of the density map  $\rho(\mathbf{r}, t)$  for  $N = 6000$  and  $\Theta = 0.81$  ( $K = 80$ ,  $\eta = 1$ ) exhibiting a 'breathing mode', i.e. expansion and contraction of the flock.

*Movie M5*– Internal flock dynamics of a large system with  $N = 48000$ , and  $\Theta = 0.89$  ( $K = 80$ ,  $\eta = 1$ ). Here, several vortices can be seen forming and breaking apart, signalling a possible connection to the BKT transition.
